# Supplementary material for: Two types of peak emotional responses to music: The psychophysiology of chills and tears
Source: PubMed Central journal article supplement (PMC5384201; doi:10.1038/srep46063), 2017-04-07
Supplement: srep46063-s1.pdf [file srep46063-s1.pdf]

## **Supplementary Information**

### **Two types of peak emotional responses to music: The psychophysiology of chills and tears**

\*Kazuma Mori<sup>1,2,3</sup> and Makoto Iwanaga<sup>4</sup>

1 National Institute of Information and Communications Technology

2 Osaka University

3 Keio University

4 Hiroshima University

\*Kazuma Mori, Center for Information and Neural Networks, National Institute of Information and Communications Technology, Japan, 1-4 Yamadaoka, Suita, 565-0871, Osaka, Tel: +8090983240, Fax: +671748612, Email: [kazumamori@nict.go.jp](mailto:kazumamori@nict.go.jp)

## Song lists

In our experiment, individual participants selected musical stimuli. Table S1 showed song lists used in the study. All songs are sung by Japanese. They are commercially available in Japan. Because our experiment was conducted Jun to August in 2011, recent some year songs are not included.

**Table S1. All songs selection for the current experiment.**

| Artist             | Song title        | Participant |
|--------------------|-------------------|-------------|
| Mr. Children       | 君が好き              | chill 1     |
| Superfly           | Hello, Hello      | chill 1     |
| MISIA              | 逢いたくていま           | chill 1     |
| Nana Mizuki        | Pray              | chill 2     |
| Suara              | キミガタメ             | chill 2     |
| YUI                | How crazy         | chill 2     |
| RADWIMPS           | 愛し                | chill 3     |
| Spitz              | めざめ               | chill 3     |
| サスケ                | 卒業の日              | chill 3     |
| 東京事変               | 透明人間              | chill 4     |
| JUDY AND MARY      | くじら 12 号          | chill 4     |
| BIGMAMA            | Paper-craft       | chill 4     |
| 電気グルーヴ             | 虹 (Short Cut Mix) | chill 5     |
| 電気グルーヴ             | 安里屋ユンタ            | chill 5     |
| 電気グルーヴ             | Shangri-La        | chill 5     |
| aiko               | カブトムシ             | chill 6     |
| Mao Abe            | 貴方の恋人になりたいのです     | chill 6     |
| ALI PROJECT        | 薔薇獄乙女             | chill 6     |
| BUMP OF CHICKEN    | 飴玉の唄              | chill 7     |
| Mao Abe            | いつの日も             | chill 7     |
| コブクロ               | Fragilemind       | chill 7     |
| Megumi Hayashibara | 集結の園へ             | chill 8     |
| B'Z                | It's show time    | chill 8     |
| B'Z                | さよなら傷だらけの日々よ      | chill 8     |

---

|                                |                          |          |
|--------------------------------|--------------------------|----------|
| PornoGraffiti                  | Rainbow                  | chill 9  |
| plenty                         | 粹                        | chill 9  |
| Anri Kumaki                    | 花言葉                      | chill 9  |
| INFINITY 16                    | いつまでもメリークリスマス            | chill 10 |
| EXILE                          | I wish for you           | chill 10 |
| flumpool                       | 君に届け                     | chill 10 |
| ジン                             | Fuga                     | chill 11 |
| Kazushi Miyazawa & Jo Hisaishi | 旅立ちの時 ～Asian Dream Song～ | chill 11 |
| BUMP OF CHICKEN                | 車輪の唄                     | chill 11 |
| WEAVER                         | 君と僕のテーマソング               | chill 12 |
| WEAVER                         | 心の中まで                    | chill 12 |
| WEAVER                         | 白朝夢                      | chill 12 |
| Angela Aki                     | 手紙 ～拝啓十五の君へ～             | chill 13 |
| HARCO                          | 世界でいちばん頑張ってる君に           | chill 13 |
| FUNKY MONKEY BABYS             | あとひとつ                    | chill 13 |
| Field of view                  | Dreams                   | chill 14 |
| Field of view                  | この街で君と暮らしたい              | chill 14 |
| 19                             | あの紙ヒコーキくもり空わって           | chill 14 |
| Ayaka Hirahara                 | jupiter                  | chill 15 |
| HY                             | 366 日                    | chill 15 |
| Satoshi Oono                   | Take me faraway          | chill 15 |
| Honey L Days                   | まなざし                     | chill 16 |
| RADWIMPS                       | ふたりごと                    | chill 16 |
| AKB48                          | 会いたかった                   | chill 16 |
| JAMProject                     | Name ～君の名は～              | chill 17 |
| JAMProject                     | 未来への咆哮                   | chill 17 |
| JAMProject                     | GONG                     | chill 17 |
| Mika Nakashima                 | 雪の華                      | chill 18 |
| Ayaka Hirahara                 | jupiter                  | chill 18 |
| MISIA                          | Everything               | chill 18 |
| Ayaka                          | 夢を味方に                    | chill 19 |
| いきものがかり                        | ふたり (Album version)      | chill 19 |

---

---

|                          |                     |          |
|--------------------------|---------------------|----------|
| Kou Shibasaki            | Nervous             | chill 19 |
| BUMP OF CHICKEN          | stage of the ground | chill 20 |
| JAMProject               | Crest of 'Z's'      | chill 20 |
| BUMP OF CHICKEN          | sailing day         | chill 20 |
| Ringo Sheena             | Spica               | chill 21 |
| ASIAN KUNG-FU GENERATION | ソラニン                | chill 21 |
| Perfume                  | Dream Fighter       | chill 21 |
| 東方神起                     | 明日は来るから             | chill 22 |
| 東方神起                     | Love in the Ice     | chill 22 |
| FTISLAND                 | Treasure            | chill 22 |
| QURULI                   | 春風                  | chill 23 |
| RC SUCCESSION            | 君が僕を知ってる            | chill 23 |
| Ringo Sheena             | Morphine            | chill 23 |
| FUNKY MONKEY BABYS       | あとひとつ               | chill 24 |
| EXILE                    | 道                   | chill 24 |
| EXILE                    | Lovers Again        | chill 24 |
| RADWIMPS                 | 有心論                 | chill 25 |
| B'z                      | 今夜月の見える丘に           | chill 25 |
| Mai Kuraki               | Time after time     | chill 25 |
| HY                       | 366 日               | chill 26 |
| Superfly                 | 愛をこめて花束を            | chill 26 |
| ゆず                       | 栄光の架橋               | chill 26 |
| Angela Aki               | Kiss Me Good-Bye    | chill 27 |
| Angela Aki               | This Love           | chill 27 |
| Angela Aki               | 愛の季節                | chill 27 |
| MONGOL800                | face to face        | chill 28 |
| MONGOL800                | 琉球愛歌                | chill 28 |
| ROAD OF MAJOR            | 雑草                  | chill 28 |
| Yoshiki Fukuyama         | 真赤な誓い               | chill 29 |
| supercell                | 君の知らない物語            | chill 29 |
| Aya Hirano               | God knows           | chill 29 |
| いきものがかり                  | 青春ライン               | chill 30 |

---

---

|                    |              |          |
|--------------------|--------------|----------|
| Angela Aki         | 手紙 ～拝啓十五の君へ～ | chill 30 |
| BUMP OF CHICKEN    | Karman       | chill 30 |
| UVERworld          | 心とココロ        | chill 31 |
| RADWIMPS           | Ground zero  | chill 31 |
| RADWIMPS           | Order made   | chill 31 |
| Mika Nakashima     | Life         | chill 32 |
| Mr. Children       | 花の匂い         | chill 32 |
| 東方神起               | why          | chill 32 |
| RADWIMPS           | me me she    | tear 1   |
| BUMP OF CHICKEN    | 飴玉の唄         | tear 1   |
| BUMP OF CHICKEN    | 才悩人応援歌       | tear 1   |
| FUNKY MONKEY BABYS | Hero         | tear 2   |
| FUNKY MONKEY BABYS | もう君がいない      | tear 2   |
| FUNKY MONKEY BABYS | あとひとつ        | tear 2   |
| BUMP OF CHICKEN    | K            | tear 3   |
| Lia                | 夏影           | tear 3   |
| BUMP OF CHICKEN    | Guild        | tear 3   |
| Mr. Children       | HANABI       | tear 4   |
| YUI                | GLORIA       | tear 4   |
| aiko               | キラキラ         | tear 4   |
| RADWIMPS           | 狭心症          | tear 5   |
| Kazumasa Oda       | 言葉にできない      | tear 5   |
| Sakanaction        | 目が明るく藍色      | tear 5   |
| Maiko Fujita       | 運命の人         | tear 6   |
| YUI                | CHE.R.RY     | tear 6   |
| ALI PROJECT        | 暗黒サイケデリック    | tear 6   |
| PornoGraffiti      | Winding Road | tear 7   |
| PornoGraffiti      | あなたがここにいたら   | tear 7   |
| レミオロメン             | 3月9日         | tear 7   |
| コブクロ               | 赤い糸          | tear 8   |
| Mao Abe            | いつの日も        | tear 8   |
| Motohiro Hata      | アイ           | tear 8   |

---

---

|                    |                    |         |
|--------------------|--------------------|---------|
| EXILE              | 願い (Album version) | tear 9  |
| EXILE              | 愛すべき未来へ            | tear 9  |
| AI                 | Story              | tear 9  |
| コブクロ               | 蕾                  | tear 10 |
| Motohiro Hata      | アイ                 | tear 10 |
| Chihiro Onitsuka   | 眩暈                 | tear 10 |
| 平川地一丁目             | ふり向けば戻り道           | tear 11 |
| SPLAY              | 冬の空                | tear 11 |
| Hanako Oku         | あなたに好きと言われたい       | tear 11 |
| Toshihire Baba     | スタートライン ～新しい風      | tear 12 |
| HY                 | NAO                | tear 12 |
| コブクロ               | 赤い糸                | tear 12 |
| RADWIMPS           | もしも                | tear 13 |
| DREAMS COME TRUE   | 何度でも               | tear 13 |
| HY                 | Song for           | tear 13 |
| Angela Aki         | 手紙 ～拝啓十五の君へ～       | tear 14 |
| Angela Aki         | This Love          | tear 14 |
| いきものがかり            | ありがとう              | tear 14 |
| Every Little Thing | Graceful World     | tear 15 |
| Janne Da Arc       | still              | tear 15 |
| Do As Infinity     | Field of dreams    | tear 15 |
| いきものがかり            | 君と歩いた季節            | tear 16 |
| CARAMEL PEPPERS    | 遠距離恋愛 SONG         | tear 16 |
| コブクロ               | 虹                  | tear 16 |
| いきものがかり            | ありがとう              | tear 17 |
| YUI                | CHE.R.RY           | tear 17 |
| FUNKY MONKEY BABYS | 告白                 | tear 17 |
| GReeeeN            | またね。               | tear 18 |
| Motohiro Hata      | 朝が来る前に             | tear 18 |
| BUMP OF CHICKEN    | Guild              | tear 18 |
| Mr. Children       | 旅立ちの唄              | tear 19 |
| いきものがかり            | 今走り出せば             | tear 19 |

---

---

|                    |                          |         |
|--------------------|--------------------------|---------|
| DREAMS COME TURE   | 未来予想図 2                  | tear 19 |
| FUNKY MONKEY BABYS | 希望の唄                     | tear 20 |
| GReeeeN            | キセキ                      | tear 20 |
| 世界の終わり             | 虹色の戦争                    | tear 20 |
| Surface            | 夢の続きへ                    | tear 21 |
| FLOW               | Sign                     | tear 21 |
| Siori Takei        | 桜色                       | tear 21 |
| スキマスイッチ            | Ice cream syndrome       | tear 22 |
| AKB48              | 桜の木になろう                  | tear 22 |
| Kisuke Kuwata      | 明日晴れるかな                  | tear 22 |
| Ulfuls             | 暴れだす                     | tear 23 |
| Mr. Children       | くるみ -for the Film 幸福な食卓- | tear 23 |
| Mr. Children       | CANDY                    | tear 23 |
| aiko               | キラキラ                     | tear 24 |
| Tee                | Baby, I love you         | tear 24 |
| RADWINPS           | me me she                | tear 24 |
| B'z                | いつかのメリークリスマス             | tear 25 |
| いきものがかり            | 帰りたくなったよ                 | tear 25 |
| Kazumasa Oda       | ラブストーリーは突然に              | tear 25 |
| Ai Otuka           | Pocket                   | tear 26 |
| SEAMO              | マタアイマショウ                 | tear 26 |
| Ai Otuka           | Planetarium              | tear 26 |
| MISIA              | 逢いたくていま                  | tear 27 |
| JUJU               | やさしきで溢れるように              | tear 27 |
| JUJU               | 明日がくるなら                  | tear 27 |
| Cocco              | もくまおう                    | tear 28 |
| Cocco              | ジュゴンの見える丘                | tear 28 |
| 東京事変               | 落日 2                     | tear 28 |
| ゆず                 | 栄光の架橋                    | tear 29 |
| Yui Aragaki        | 赤い糸                      | tear 29 |
| Aqua Timez         | 千の夜をこえて                  | tear 29 |
| Shion Tuji         | skycord ~大人になる君へ~        | tear 30 |

---

---

|                     |                    |         |
|---------------------|--------------------|---------|
| Mai Kuraki          | Secret of my heart | tear 30 |
| コブクロ                | 風                  | tear 30 |
| MINMI               | imagine            | tear 31 |
| SunMin              | Love You           | tear 31 |
| Daichi Miura        | Knock Knock Knock  | tear 31 |
| JUNSU from 東方神起     | Rainy Night        | tear 32 |
| FUNKY MONKEY BABYS  | もう君がいない            | tear 32 |
| JUNSU/JEJUNG/YUCHUN | いつだって君に            | tear 32 |
| aiko                | ヒカリ                | tear 33 |
| Every Little Thing  | また あした             | tear 33 |
| Kou Shibasaki       | ひと恋めぐり             | tear 33 |
| UVERworld           | 君の好きなうた            | tear 34 |
| Hikaru Utada        | Prisoner of Love   | tear 34 |
| EXILE               | Lovers Again       | tear 34 |

---



## Musical features

In order to know psychoacoustic features of chills and tears songs, we analyse stimuli by MIR (Music Information Retrieval) toolbox 1.6.1<sup>1</sup>. Table S2 shows musical features of above chills and tears songs as a function of group and the results of the t-tests for the chills and tears groups. Because some participants selected same song, we excluded duplicative 28 songs from the analysis. Chills songs were significantly higher event density, tempo, zerocross, brightness, spectral central, and spectral entropy than tears songs. Whereas tears songs were significantly higher spectral skewness and spectral kurtosis than chills songs. The results indicate that chills songs were characterized by high speed, many notes, and including higher spectral frequency. Tears song were characterized by stable low frequency timbre. This could reflect to subjective emotional responses.

**Table S2. Musical features for chills and tears elicited songs**

| Acoustic features | Mean (SD)     |               | t-test   |          |    |
|-------------------|---------------|---------------|----------|----------|----|
|                   | Chill         | Tear          | <i>T</i> | <i>p</i> |    |
| <b>Dynamics</b>   |               |               |          |          |    |
| Rms               | 0.105 (0.003) | 0.106 (0.003) | -1.91    | .06      |    |
| Low energy        | 0.461 (0.048) | 0.464 (0.044) | -0.44    | .66      |    |
| Event density     | 2.987 (0.786) | 2.629 (0.755) | 2.73     | .007     | ** |
| <b>Rhythm</b>     |               |               |          |          |    |
| Tempo             | 145.6 (28.3)  | 137.2 (27.1)  | 2.14     | .03      | *  |
| Pulse clarity     | 0.535 (0.138) | 0.532 (0.134) | -0.38    | .70      |    |
| <b>Timbre</b>     |               |               |          |          |    |
| Zerocross         | 1479 (348)    | 1317 (292)    | 2.89     | .004     | ** |
| Rolloff           | 8138 (1237)   | 7831 (1287)   | 1.54     | .12      |    |
| Brightness        | 0.565 (0.065) | 0.540 (0.061) | 2.24     | .03      | *  |
| Spectral central  | 3683 (505)    | 3515 (474)    | 2.04     | .04      | *  |
| Spectral spread   | 4212 (392)    | 4162 (396)    | 0.82     | .41      |    |
| Spectral skewness | 1.608 (0.262) | 1.702 (0.270) | -2.14    | .03      | *  |
| Spectral kurtosis | 5.233 (1.065) | 5.607 (1.226) | -1.99    | .05      | *  |
| Spectral flatness | 0.294 (0.059) | 0.283 (0.057) | 1.05     | .29      |    |
| Spectral entropy  | 0.930 (0.010) | 0.925 (0.010) | 2.83     | .005     | ** |

Pitch

|               |               |               |      |     |
|---------------|---------------|---------------|------|-----|
| Pitch (mono)  | 643.4 (367.7) | 608.7 (351.7) | 0.66 | .66 |
| Inharmonicity | 0.483 (0.008) | 0.482 (0.007) | 0.81 | .42 |

---

1. Lartillot, O., & Toiviainen, P. A matlab toolbox for musical feature extraction from audio. *International Conference on Digital Audio Effects*. Bordeaux. (2007).
